# Supplementary material for: Wet chemical synthesis of TGA capped Ag 2 S nanoparticles and their use for fluorescence imaging and temperature sensing in living cells
Source: Royal Society of Chemistry journal article supplement (doi:10.1039/d3ra06705j), 2023-01-01
Supplement: d3ra06705j1.pdf [file d3ra06705j1.pdf]

## Supporting information

### Wet chemical synthesis of TGA capped Ag<sub>2</sub>S nanoparticles and their use for fluorescence imaging and temperature sensing in living cells

Mayssa Ibrahim<sup>a</sup>, P. Camarero<sup>b</sup>, Liyan Ming<sup>b</sup>, Mohamed Haouari<sup>a</sup>, Noura Amamou<sup>a</sup>, P. Haro-González<sup>b,c</sup>, Fredj Hassen<sup>d</sup>

*a) Laboratoire d'Interfaces et de Matériaux Avancés (LIMA), Faculté des Sciences, Université de Monastir*

*b) Nanomaterials for bioimaging group and Instituto de materiales Nicolás Cabrera. Universidad Autónoma de Madrid. Madrid, 28049 (Spain)*

*c) Institute for Advanced Research in Chemical Sciences. Universidad Autónoma de Madrid. Madrid, 28049 (Spain)*

*d) Laboratoires de Physique des Semi-conducteurs et des Composantes Electroniques (LPSCE), Université de Monastir*

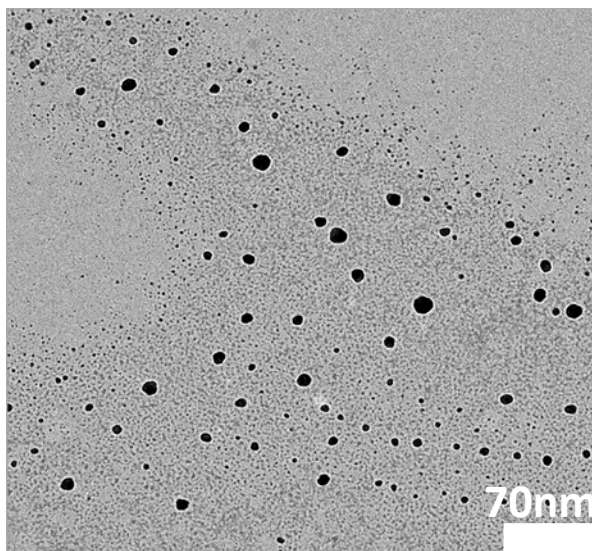

**Figure S<sub>1</sub>:** TEM images showing the presence of small and large aggregates of individual TGA-Ag<sub>2</sub>S nanoparticles.

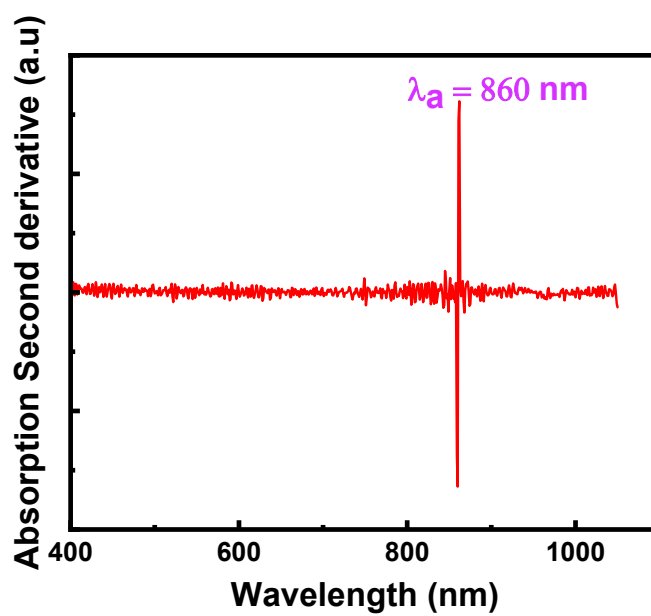

**Figure S<sub>2</sub>:** Second derivative of TGA-Ag<sub>2</sub>S nanoparticles dispersed in water.

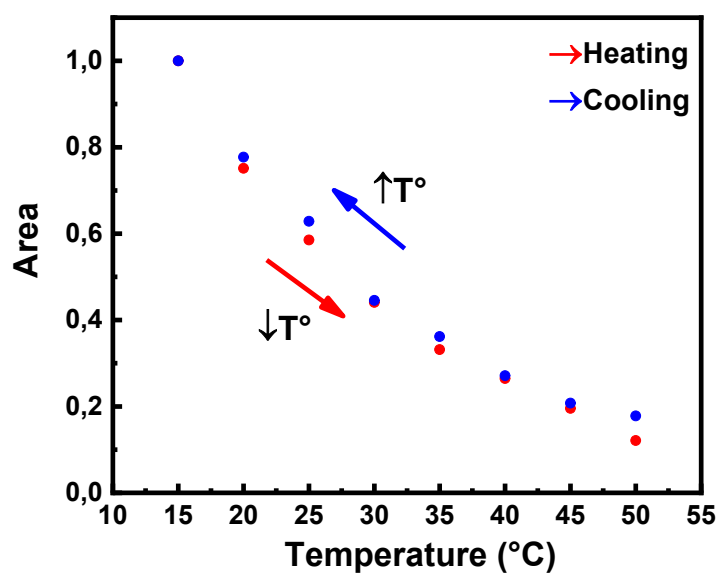

**Figure S<sub>3</sub>:** Evolution of the integrated area of PL band of TGA-Ag<sub>2</sub>S nanoparticles dispersed in water and recorded for heating and cooling cycle under 488 nm excitation wavelength.

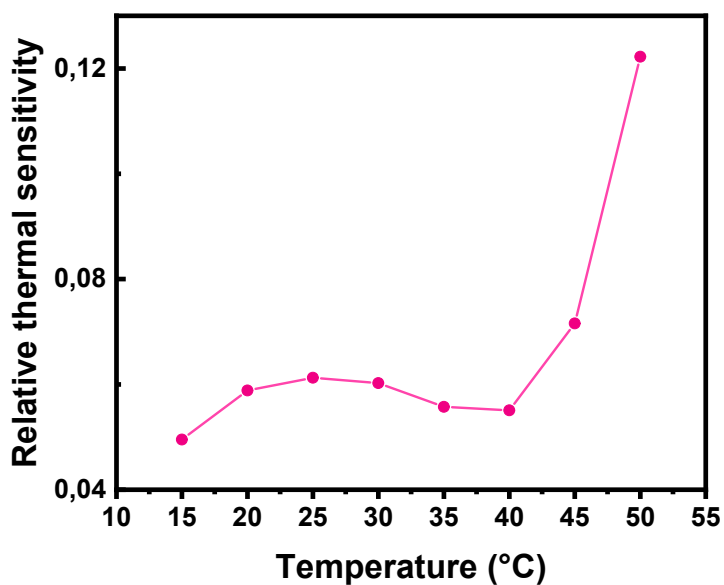

**Figure S<sub>4</sub>:** Variation of the relative thermal sensitivity deduced from the PL intensity of TGA-Ag<sub>2</sub>S nanoparticles dispersed in water and recorded under an excitation wavelength equal to 488 nm.

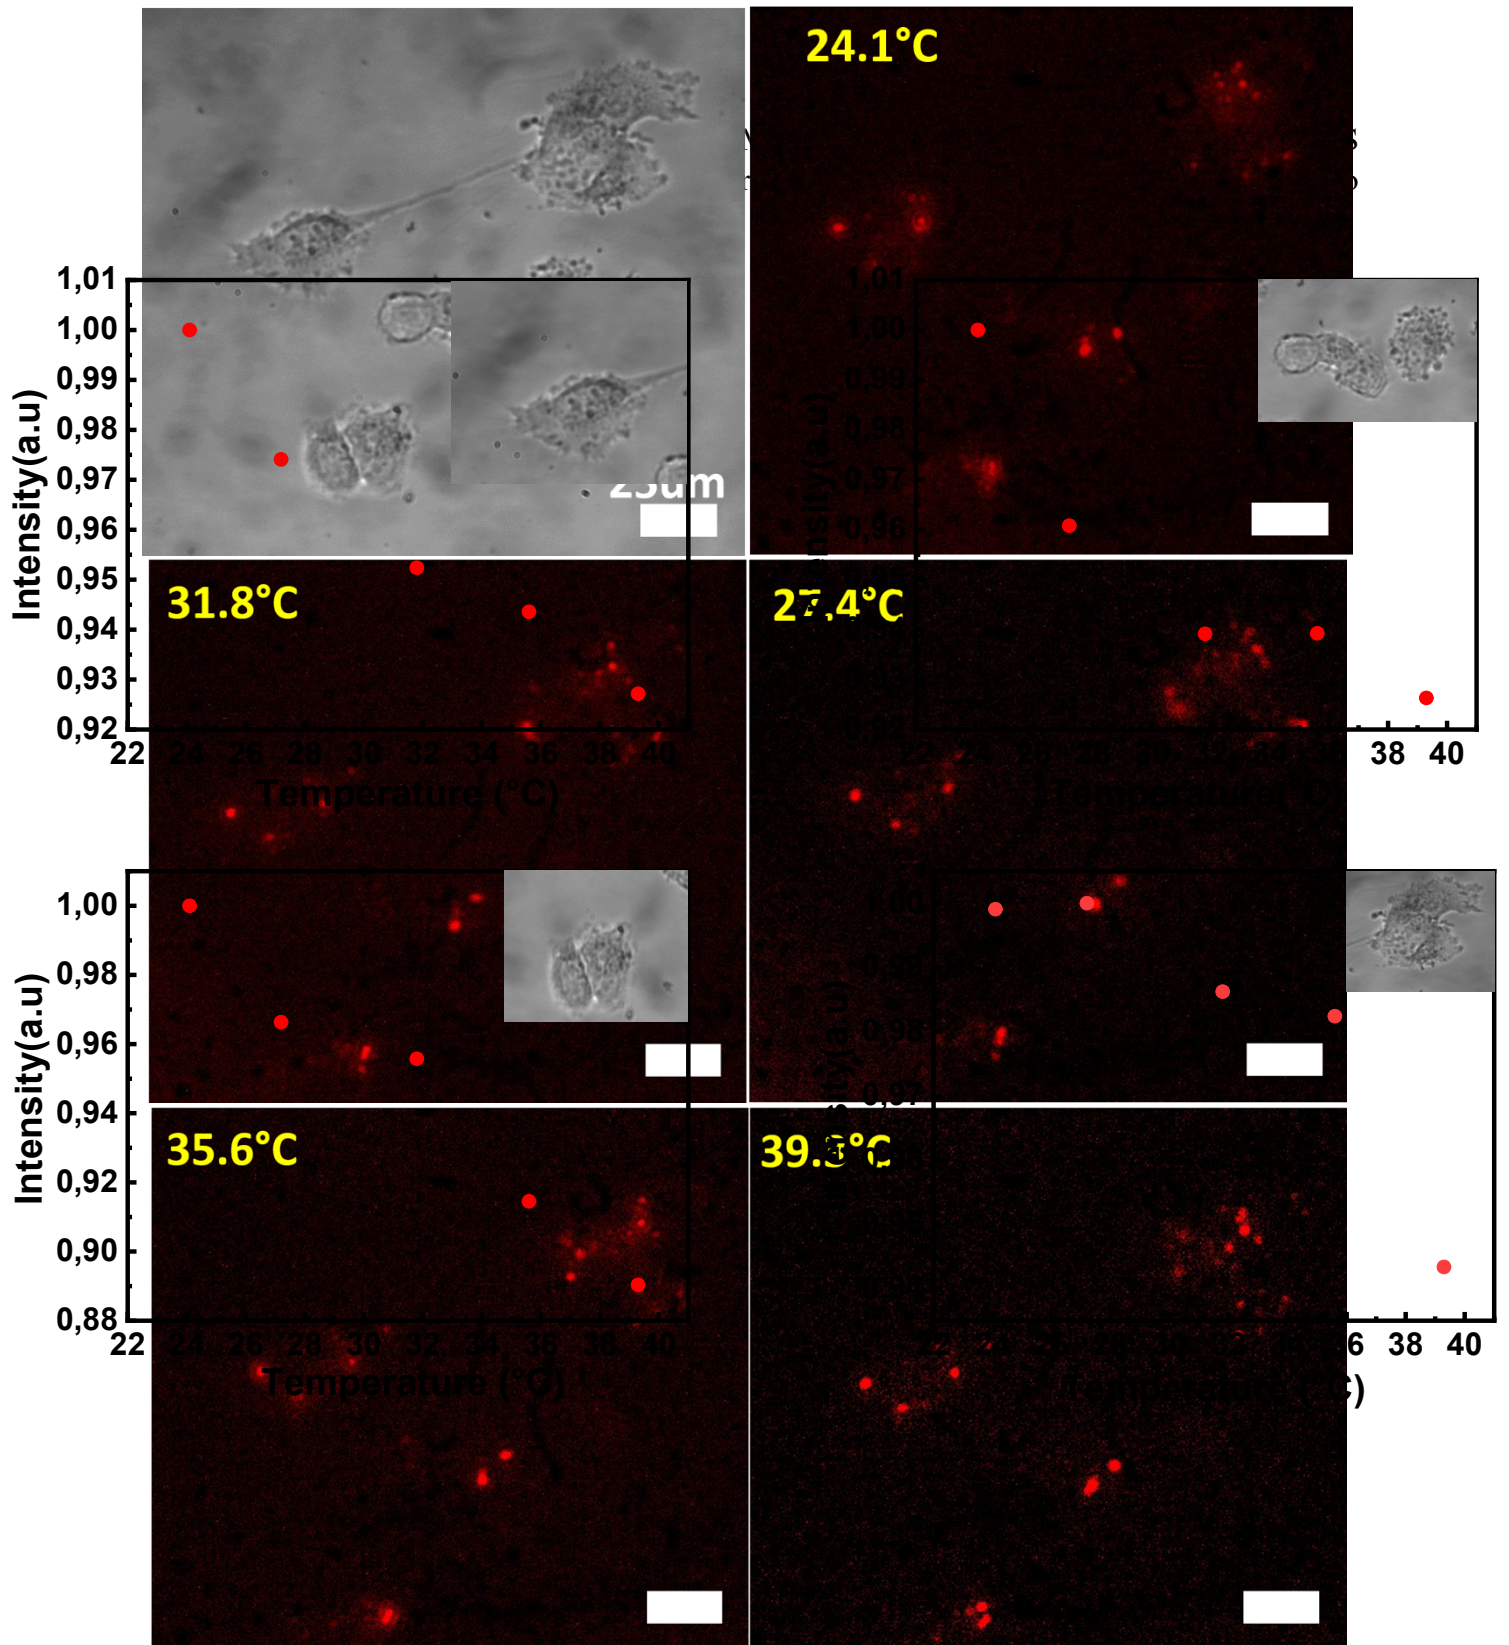

**Figure S<sub>6</sub>:** Evolution with temperature of the PL intensity extracted from Fluorescence images of U-87 living cells incubated with TGA-Ag<sub>2</sub>S nanoparticles and recorded at different temperature under an excitation wavelength equal to 488 nm.
